# Supplementary material for: Analysis of the giant genomes of Fritillaria (Liliaceae) indicates that a lack of DNA removal characterizes extreme expansions in genome size
Source: PubMed Central journal article supplement (PMC4744688; doi:10.1111/nph.13471), 2015-06-08
Supplement: NPH-208-596-s001.pdf [file NPH-208-596-s001.pdf]

## ***New Phytologist* Supporting Information Figs S1 & S2, Tables S1-S7 and Notes S1 & S2**

**Article title:** Analysis of the giant genomes of *Fritillaria* (Liliaceae) indicates that a lack of DNA removal characterizes extreme expansions in genome size.

**Authors:** Laura J. Kelly, Simon Renny-Byfield, Jaume Pellicer, Jiří Macas, Petr Novák, Pavel Neumann, Martin A. Lysak, Peter D. Day, Madeleine Berger, Michael F. Fay, Richard A. Nichols, Andrew R. Leitch and Ilia J. Leitch.

The following Supporting Information is available for this article:

**Fig. S1** Phylogenetic relationships between *Fritillaria affinis*, *F. imperialis* and related species.

**Fig. S2** Relationship between the size of the single/low-copy (S/L) sequence fraction and genome size.

**Table S1** Monoploid genome sizes used in ancestral state reconstruction.

**Table S2** Plant material used for sequencing and genome size estimation.

**Table S3** Newly generated 1C-values.

**Table S4** Summary of 454 sequence data obtained for each species after filtering for duplicate and organellar reads.

**Table S5** Top repeat families from *Fritillaria affinis*.

**Table S6** Top repeat families from *Fritillaria imperialis*.

**Table S7** Single/low-copy fraction size and genome size.

**Notes S1** Potential impact of differing sequence similarity thresholds on patterns of repeat diversity.

**Notes S2** Analysis of intra-family heterogeneity of repeats in *Fritillaria*.

### **Supplementary References**

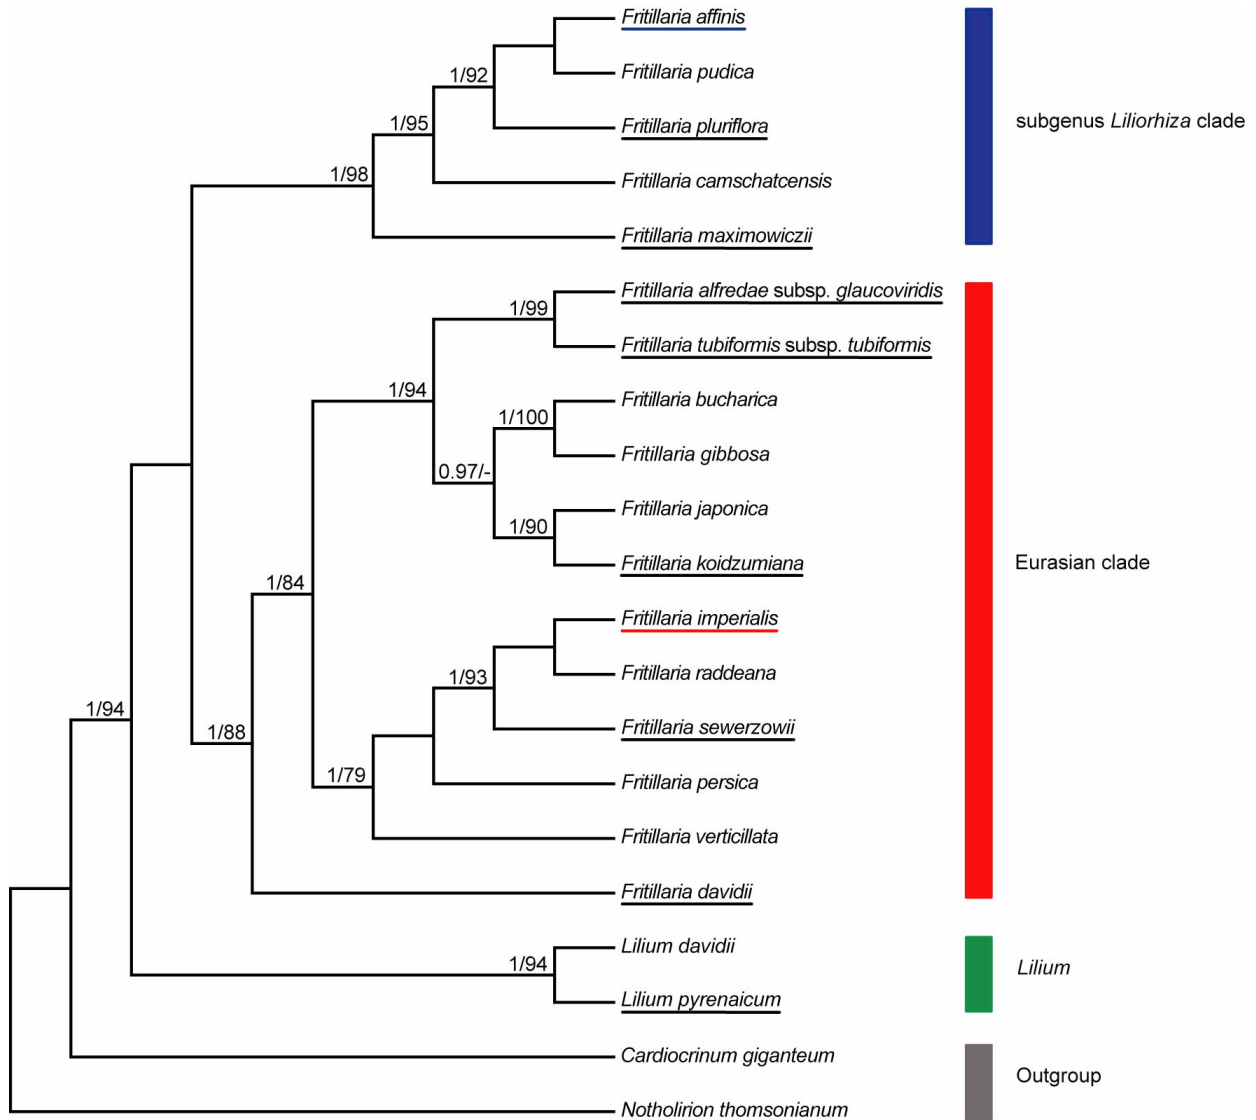

**Fig. S1** Phylogenetic relationships between *Fritillaria affinis* and *F. imperialis* (the key taxa analysed in this study) and related species. Majority rule consensus tree with all compatible groupings, from the Bayesian analysis. Values above branches indicate node support (posterior probabilities (PP) of  $\geq 0.95$ /bootstrap percentages (BP)  $\geq 70$ ); a dash indicates a node with PP  $\geq 0.95$  but BP  $< 70$ . PP values of  $< 0.95$  and BP values of  $< 70$  are not shown. The two major groups of species within *Fritillaria* are indicated: the subgenus *Liliorhiza* clade is comprised only of members of this subgenus (including *F. affinis*, underlined in blue), which occur mainly in North America; the Eurasian clade contains members of all other subgenera of *Fritillaria* (including *F. imperialis*, underlined in red), encompassing species from Europe, North Africa, the Middle East, Central Asia and China. Names underlined in black indicate species subjected to low-pass 454 sequencing in addition to *F. affinis* and *F. imperialis*.

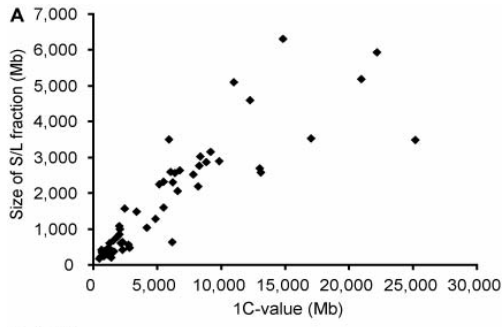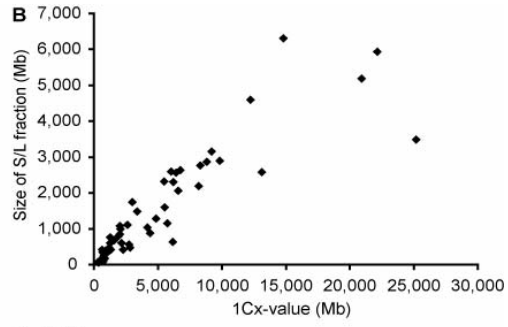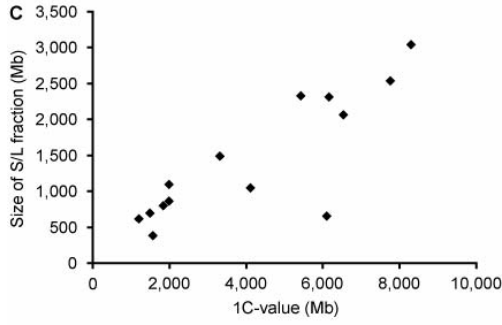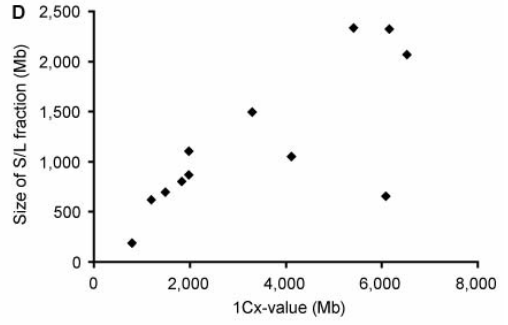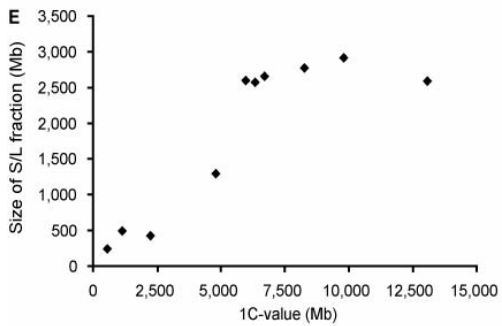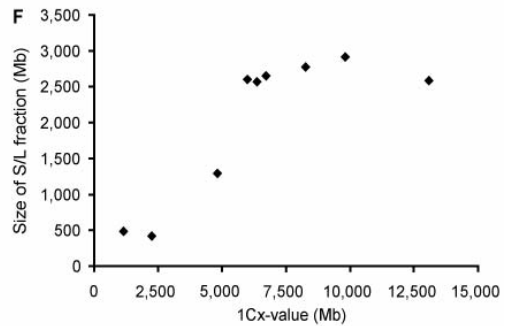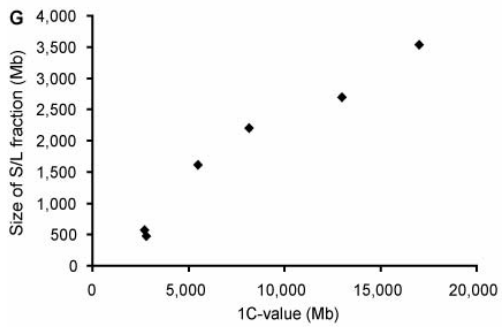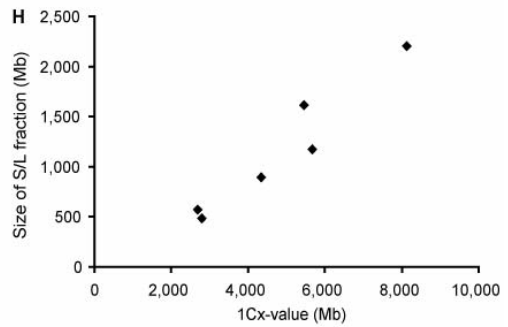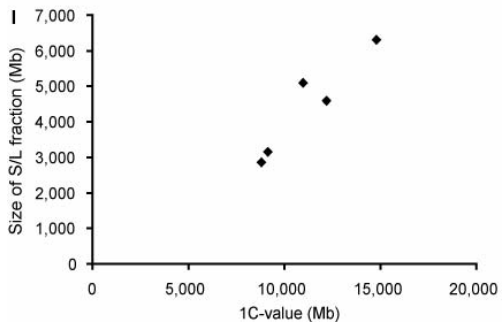

|                              | Size of S/L fraction versus 1C-values |            | Size of S/L fraction versus 1Cx-values |            |
|------------------------------|---------------------------------------|------------|----------------------------------------|------------|
|                              | Tau-b                                 | P          | Tau-b                                  | P          |
| All species ( $n = 57/52$ )* | 0.784                                 | < 2.22e-16 | 0.816                                  | < 2.22e-16 |
| Asteraceae ( $n = 14/12$ )   | 0.685                                 | 0.000824   | 0.626                                  | 0.005971   |
| Fabaceae ( $n = 10/9$ )      | 0.733                                 | 0.004208   | 0.667                                  | 0.016489   |
| Poaceae ( $n = 6$ )          | 0.867                                 | 0.024171   | 0.733                                  | 0.060289   |
| Ranunculaceae ( $n = 5$ )    | 0.800                                 | 0.086411   | n/a                                    | n/a        |

**Fig. S2** Relationship between the size of the single/low-copy (S/L) sequence fraction and genome size. (a) Scatter plot showing S/L fraction size versus 1C genome size, including data from all species ( $n = 57$ ). (b) Scatter plot showing S/L fraction size versus 1Cx genome size, including data from all species ( $n = 52$ ). (c) Scatter plot showing S/L fraction size versus 1C genome size, including data from Asteraceae ( $n = 14$ ). (d) Scatter plot showing S/L fraction size versus 1Cx genome size, including data from Asteraceae ( $n = 12$ ). (e) Scatter plot showing S/L fraction size versus 1C genome size, including data from Fabaceae ( $n = 10$ ). (f) Scatter plot showing S/L fraction size versus 1Cx genome size, including data from Fabaceae ( $n = 9$ ). (g) Scatter plot showing S/L fraction size versus 1C genome size, including data from Poaceae ( $n = 6$ ). (h) Scatter plot showing S/L fraction size versus 1Cx genome size, including data from Poaceae ( $n = 6$ ). (i) Scatter plot showing S/L fraction size versus 1C genome size, including data from Ranunculaceae ( $n = 5$ ). (j) Results of correlation tests (Kendall's tau-b) between S/L fraction size and genome size (\* fewer species are included for the tests with 1Cx genome size because ploidy information was not available for all taxa; correlation between S/L fraction size and 1Cx genome size was not tested for in Ranunculaceae because there were  $< 5$  species with ploidy data). Data used to construct these plots are included in Table S7.

**Table S1** Monoploid genome sizes used in ancestral state reconstruction.

| Species                                                 | 1Cx-value* (Gb) | Reference                         |
|---------------------------------------------------------|-----------------|-----------------------------------|
| <i>Cardiocrinum giganteum</i>                           | 38.533          | This study                        |
| <i>Fritillaria affinis</i>                              | 44.939          | This study                        |
| <i>Fritillaria alfredae</i> subsp. <i>glaucoviridis</i> | 63.785          | This study                        |
| <i>Fritillaria bucharica</i>                            | 44.118          | This study                        |
| <i>Fritillaria camschatcensis</i>                       | 37.555          | Ambrožová <i>et al.</i> , (2011)  |
| <i>Fritillaria davidii</i>                              | 33.252          | This study                        |
| <i>Fritillaria gibbosa</i>                              | 41.819          | This study                        |
| <i>Fritillaria imperialis</i>                           | 45.588          | This study                        |
| <i>Fritillaria japonica</i>                             | 85.379          | Ambrožová <i>et al.</i> , (2011)  |
| <i>Fritillaria koidzumiana</i>                          | 85.242          | This study                        |
| <i>Fritillaria maximowiczii</i>                         | 33.536          | This study                        |
| <i>Fritillaria persica</i>                              | 40.124          | This study                        |
| <i>Fritillaria pluriflora</i>                           | 40.616          | Hanson <i>et al.</i> <sup>†</sup> |
| <i>Fritillaria pudica</i>                               | 37.457          | Ambrožová <i>et al.</i> , (2011)  |
| <i>Fritillaria raddeana</i>                             | 41.643          | This study                        |
| <i>Fritillaria sewerzowii</i>                           | 43.472          | This study                        |
| <i>Fritillaria tubiformis</i> subsp. <i>tubiformis</i>  | 44.010          | This study                        |
| <i>Fritillaria verticillata</i>                         | 40.724          | This study                        |
| <i>Lilium davidii</i>                                   | 38.005          | This study                        |
| <i>Lilium pyrenaicum</i>                                | 37.976          | This study                        |
| <i>Notholirion thomsonianum</i>                         | 36.607          | This study                        |

\*1Cx-values (monoploid genome size, c.f. Greilhuber *et al.*, 2005) were calculated by dividing the 2C-value by ploidy (see Table S3).

<sup>†</sup>Value listed in Plant DNA C-values Database (source - Hanson L, Leitch IJ, Bennett MD. Jodrell Laboratory, Royal Botanic Gardens, Kew); material from Kew Living Collection 2004-3476 was measured using Feulgen microdensitometry as described in Hanson *et al.*, (2001). Material inferred as diploid on basis of its 1C-value being close to that for diploid material from its close relative *F. affinis* (see Fig. S1 and Table S3).

**Table S2** Plant material used for sequencing and genome size estimation.

| Species                                                 | Collection accession*     | DNA bank number† | Voucher details‡       | 454 | Sanger§ | Flow cytometry |
|---------------------------------------------------------|---------------------------|------------------|------------------------|-----|---------|----------------|
| <i>Cardiocrinum giganteum</i>                           | KLC 1988-4907             | 3689             | Chase 3689; K          | —   | X       | X              |
| <i>Fritillaria affinis</i>                              | KLC 2010-905              | 33601            | Chase 31485; K         | X   | X       | X              |
| <i>Fritillaria alfredae</i> subsp. <i>glaucoviridis</i> | LH 744                    | 37858            | Fritillaria Icones 744 | X   | X       | X              |
| <i>Fritillaria bucharica</i>                            | LH 488                    | 37861            | Fritillaria Icones 488 | —   | X       | —              |
| <i>Fritillaria bucharica</i>                            | KLC 2010-917              | n/a              | Photo                  | —   | —       | X              |
| <i>Fritillaria camschatcensis</i>                       | LH 617                    | 31539            | Fritillaria Icones 617 | —   | X       | —              |
| <i>Fritillaria davidii</i>                              | KLC 2004-3461             | 25690            | n/a                    | X   | X       | —              |
| <i>Fritillaria davidii</i>                              | KLC 1992-3705             | n/a              | n/a                    | —   | —       | X              |
| <i>Fritillaria gibbosa</i>                              | KLC 2004-3469             | 31559            | Chase 31559; K         | —   | X       | X              |
| <i>Fritillaria imperialis</i>                           | KLC s.n.                  | 33597            | n/a                    | X   | X       | —              |
| <i>Fritillaria imperialis</i>                           | 1973-19742; KLC s.n.¶     | n/a              | Photo                  | —   | —       | X              |
| <i>Fritillaria japonica</i>                             | LH 323                    | 31543            | n/a                    | —   | X       | —              |
| <i>Fritillaria koidzumiana</i>                          | KLC 1979-1888             | 31496/37750      | 1983; K                | X   | X       | X              |
| <i>Fritillaria maximowiczii</i>                         | KLC 2005-2043             | 33600            | Chase 31497; K         | X   | X       | X              |
| <i>Fritillaria persica</i>                              | KLC 1923-41201            | 3496             | Chase 3496; K          | —   | X       | —              |
| <i>Fritillaria persica</i>                              | KLC 2010-1774, KLC s.n.** | n/a              | Photo                  | —   | —       | X              |
| <i>Fritillaria pluriflora</i>                           | LH 084                    | 37775            | Fritillaria Icones 084 | X   | X       | —              |
| <i>Fritillaria pudica</i>                               | KLC 1986-6110             | 24359            | Photo                  | —   | X       | —              |
| <i>Fritillaria raddeana</i>                             | KLC 1973-54               | 745              | Chase 745; K           | —   | X       | —              |
| <i>Fritillaria raddeana</i>                             | KLC 1966-65810            | n/a              | Photo                  | —   | —       | X              |
| <i>Fritillaria sewerzowii</i>                           | KLC 1995-4397             | 37751            | Photo                  | X   | X       | X              |
| <i>Fritillaria tubiformis</i> subsp. <i>tubiformis</i>  | KLC 1966-109              | 2558/24360       | Chase 2558; K          | X   | X       | X              |
| <i>Fritillaria verticillata</i>                         | KLC 2005-2049             | 24363            | Photo                  | —   | X       | X              |
| <i>Lilium davidii</i>                                   | KLC 1979-867              | 3697             | Chase 3697; K          | —   | X       | X              |
| <i>Lilium pyrenaicum</i>                                | KLC 1995-1667             | 37918            | Chase 8639; K          | X   | X       | X              |
| <i>Notholirion thomsonianum</i>                         | KLC 1970-4025             | 448              | Chase 448; K           | —   | X       | X              |

\*KLC – Kew living collection; accession numbers for material cultivated at the Royal Botanic Gardens, Kew. LH – Laurence Hill; accession numbers for material cultivated by Laurence Hill, Petersham Lodge ([www.fritillariaicones.com](http://www.fritillariaicones.com)). s.n. – without accession number.

† Accession numbers for the DNA Bank at the Royal Botanic Gardens, Kew (<http://data.kew.org/dnabank/homepage.html>). Where two numbers are listed the first extraction was used for Sanger sequencing and the second for 454 sequencing.

‡K – The Herbarium at the Royal Botanic Gardens, Kew. Accessions from Laurence Hill have photographic vouchers (Fritillaria Icones), which can be accessed as PDFs online at: [www.fritillariaicones.com/icones/Icones.html](http://www.fritillariaicones.com/icones/Icones.html). Accessions marked ‘photo’ have available photographs of the plant in flower; these are available on request from L.J.K. ([l.kelly@qmul.ac.uk](mailto:l.kelly@qmul.ac.uk)). Accessions marked “n/a” do not have a voucher specimen.

§ Sanger sequences for *Fritillaria davidii*, *F. imperialis*, *F. japonica* and *F. koidzumiana* were newly generated; GenBank accession numbers: KP998197 - KP998208. All other sequences were taken from Day *et al.*, (2014); see Table S4 in Day *et al.*, (2014) for accession numbers.

¶ For *F. imperialis*, fresh leaf material for the same plant as used for sequencing was not available for genome size estimation, and instead five alternative plants (including four without accession numbers) were used.

|| Same material as Laurence Hill accession 485; photographic voucher available at: [www.fritillariaicones.com/icones/ic400/Fritillaria\\_Icones485.pdf](http://www.fritillariaicones.com/icones/ic400/Fritillaria_Icones485.pdf)

\*\* For *F. persica*, fresh leaf material for the same plant as used for sequencing was not available for genome size estimation, and instead three alternative plants (including two without accession numbers) were used.

**Table S3** Newly generated 1C-values.

| Species                                                 | 1C (pg, mean $\pm$ s.d.) | 1C (Mb) <sup>*</sup> | Ploidy <sup>†</sup>      |
|---------------------------------------------------------|--------------------------|----------------------|--------------------------|
| <i>Cardiocrinum giganteum</i>                           | 39.40 $\pm$ 0.22         | 38,533               | 2 $\times$ <sup>‡</sup>  |
| <i>Fritillaria affinis</i>                              | 45.95 $\pm$ 0.59         | 44,939               | 2 $\times$               |
| <i>Fritillaria alfredae</i> subsp. <i>glaucoviridis</i> | 65.22 $\pm$ 0.48         | 63,785               | 2 $\times$ <sup>§</sup>  |
| <i>Fritillaria bucharica</i>                            | 45.11 $\pm$ 0.19         | 44,118               | 2 $\times$               |
| <i>Fritillaria davidii</i>                              | 34.00 $\pm$ 0.35         | 33,252               | 2 $\times$ <sup>‡</sup>  |
| <i>Fritillaria gibbosa</i>                              | 42.76 $\pm$ 0.35         | 41,819               | 2 $\times$ <sup>‡</sup>  |
| <i>Fritillaria imperialis</i>                           | 46.01 $\pm$ 0.17         | 44,998               | 2 $\times$ <sup>¶</sup>  |
| <i>Fritillaria imperialis</i>                           | 46.61 $\pm$ 0.10         | 45,585               | 2 $\times$ <sup>¶</sup>  |
| <i>Fritillaria imperialis</i>                           | 46.62 $\pm$ 0.11         | 45,594               | 2 $\times$               |
| <i>Fritillaria imperialis</i>                           | 46.82 $\pm$ 0.11         | 45,790               | 2 $\times$               |
| <i>Fritillaria imperialis</i>                           | 47.01 $\pm$ 0.21         | 45,976               | 2 $\times$               |
| <i>Fritillaria koidzumiana</i>                          | 87.16 $\pm$ 0.26         | 85,242               | 2 $\times$               |
| <i>Fritillaria maximowiczii</i>                         | 34.29 $\pm$ 0.06         | 33,536               | 2 $\times$ <sup>  </sup> |
| <i>Fritillaria persica</i>                              | 40.65 $\pm$ 0.37         | 39,756               | 2 $\times$ <sup>  </sup> |
| <i>Fritillaria persica</i>                              | 41.06 $\pm$ 0.18         | 40,157               | 2 $\times$ <sup>  </sup> |
| <i>Fritillaria persica</i>                              | 41.37 $\pm$ 0.13         | 40,460               | 2 $\times$ <sup>  </sup> |
| <i>Fritillaria raddeana</i>                             | 42.58 $\pm$ 0.09         | 41,643               | 2 $\times$ <sup>  </sup> |
| <i>Fritillaria sewerzowii</i>                           | 44.45 $\pm$ 0.40         | 43,472               | 2 $\times$               |
| <i>Fritillaria tubiformis</i> subsp. <i>tubiformis</i>  | 45.00 $\pm$ 0.19         | 44,010               | 2 $\times$ <sup>‡</sup>  |
| <i>Fritillaria verticillata</i>                         | 41.64 $\pm$ 0.13         | 40,724               | 2 $\times$ <sup>  </sup> |
| <i>Lilium davidii</i>                                   | 38.86 $\pm$ 0.38         | 38,005               | 2 $\times$ <sup>**</sup> |
| <i>Lilium pyrenaicum</i>                                | 38.83 $\pm$ 0.09         | 37,976               | 2 $\times$ <sup>**</sup> |
| <i>Notholirion thomsonianum</i>                         | 37.43 $\pm$ 0.02         | 36,607               | 2 $\times$ <sup>‡</sup>  |

<sup>\*</sup> 1 pg = 978 Mbp (Doležel et al 2003).

<sup>†</sup> Unless otherwise indicated, ploidy was verified on the basis of chromosome counts carried out on the same plant as used for genome-size estimation.

<sup>‡</sup> Inferred from published chromosome count for the same living accession from Leitch *et al.*, (2007) or Ambrožová et al (2011).

<sup>§</sup> Material inferred as diploid on basis of its 1C-value being close to that for the diploid *F. alfredae* subsp. *glaucoviridis* accession measured in Leitch *et al.*, (2007).

<sup>¶</sup> Material inferred as diploid on basis of its 1C-value being close to that for the other *F. imperialis* accessions where chromosome counts were made.

<sup>||</sup> Material inferred as diploid on basis of its 1C-value being close to that for the diploid accessions of the same species measured in Leitch *et al.*, (2007), Ambrožová et al (2011) or Fujimoto *et al.*, (2005).



\*\*Material inferred as diploid on basis of 1C-values being close to those for diploid individuals of these species measured previously (see Plant DNA C-values database release 6.0, <http://data.kew.org/cvalues/>).

**Table S4** Summary of 454 sequence data obtained for each species after filtering for duplicate and organellar reads.

| Species*                                                | Number of reads | Total Mb | Genome coverage† (%) |
|---------------------------------------------------------|-----------------|----------|----------------------|
| A                                                       |                 |          |                      |
| <i>Fritillaria affinis</i>                              | 2,348,745       | 821.58   | 1.83                 |
| <i>Fritillaria imperialis</i>                           | 2,274,576       | 816.48   | 1.79                 |
| B                                                       |                 |          |                      |
| <i>Fritillaria alfredae</i> subsp. <i>glaucoviridis</i> | 98,843          | 28.11    | 0.04                 |
| <i>Fritillaria davidii</i>                              | 114,387         | 36.60    | 0.11                 |
| <i>Fritillaria koidzumiana</i>                          | 80,685          | 29.23    | 0.03                 |
| <i>Fritillaria maximowiczii</i>                         | 89,997          | 33.20    | 0.10                 |
| <i>Fritillaria pluriflora</i>                           | 105,790         | 37.69    | 0.09                 |
| <i>Fritillaria sewerzowii</i>                           | 95,794          | 33.99    | 0.08                 |
| <i>Fritillaria tubiformis</i> subsp. <i>tubiformis</i>  | 87,315          | 33.25    | 0.08                 |
| <i>Lilium pyrenaicum</i>                                | 103,035         | 30.55    | 0.08                 |

\*Set A – two plates of 454 sequencing performed per species; set B – one lane of 454 sequencing performed per species (see Materials and Methods).

†Based on genome sizes listed in Table S1.

**Table S5** Top repeat families from *Fritillaria affinis*.

| Rank <sup>a</sup> | Name <sup>b</sup> | Repeat Type    | Estimated abundance (Mb)/proportion of the genome (%) <sup>c</sup> |                                                        |                            |                               |                                |                                 |                               |                               |                                                        |                          |
|-------------------|-------------------|----------------|--------------------------------------------------------------------|--------------------------------------------------------|----------------------------|-------------------------------|--------------------------------|---------------------------------|-------------------------------|-------------------------------|--------------------------------------------------------|--------------------------|
|                   |                   |                | <i>Fritillaria affinis</i>                                         | <i>Fritillaria affinis</i> subsp. <i>glaucoviridis</i> | <i>Fritillaria davidii</i> | <i>Fritillaria imperialis</i> | <i>Fritillaria koidzumiana</i> | <i>Fritillaria maximowiczii</i> | <i>Fritillaria pluriflora</i> | <i>Fritillaria sewerzowii</i> | <i>Fritillaria tubiformis</i> subsp. <i>tubiformis</i> | <i>Lilium pyrenaicum</i> |
| 1                 | CL1               | Tandem repeat  | 5029.14/11.19                                                      | 0.00/0.00                                              | 0.00/0.00                  | 0.04/0.00                     | 0.00/0.00                      | 0.00/0.00                       | 4.18/0.01                     | 0.00/0.00                     | 0.00/0.00                                              | 0.05/0.00                |
| 2                 | CL2               | LTR: Gypsy     | 922.58/2.05                                                        | 0.00/0.00                                              | 0.06/0.00                  | 0.02/0.00                     | 0.29/0.00                      | 11.23/0.03                      | 208.28/0.51                   | 0.00/0.00                     | 0.00/0.00                                              | 52.43/0.14               |
| 3                 | CL3               | LTR: Gypsy     | 597.33/1.33                                                        | 0.13/0.00                                              | 0.11/0.00                  | 0.12/0.00                     | 0.00/0.00                      | 19.44/0.06                      | 486.62/1.20                   | 0.22/0.00                     | 0.06/0.00                                              | 0.14/0.00                |
| 4                 | CL4               | LTR: Gypsy     | 268.05/0.60                                                        | 0.00/0.00                                              | 0.00/0.00                  | 0.01/0.00                     | 0.00/0.00                      | 18.51/0.06                      | 108.58/0.27                   | 0.00/0.00                     | 0.00/0.00                                              | 0.00/0.00                |
| 5                 | CL5               | LTR: Gypsy     | 233.670.52/                                                        | 0.12/0.00                                              | 0.10/0.00                  | 0.02/0.00                     | 0.24/0.00                      | 0.00/0.00                       | 86.18/0.21                    | 0.00/0.00                     | 0.06/0.00                                              | 0.00/0.00                |
| 6                 | CL8               | LTR: Gypsy     | 206.80/0.46                                                        | 0.00/0.00                                              | 0.99/0.00                  | 0.44/0.00                     | 0.37/0.00                      | 113.93/0.34                     | 164.92/0.41                   | 0.11/0.00                     | 0.00/0.00                                              | 0.00/0.00                |
| 7                 | CL6               | LTR: Copia     | 203.98/0.45                                                        | 1.75/0.00                                              | 3.59/0.01                  | 1.21/0.00                     | 0.00/0.00                      | 3.90/0.01                       | 155.11/0.38                   | 0.30/0.00                     | 1.60/0.00                                              | 0.27/0.00                |
| 8                 | CL7               | LTR: Gypsy     | 183.99/0.41                                                        | 0.00/0.00                                              | 0.00/0.00                  | 0.04/0.00                     | 0.00/0.00                      | 2.15/0.01                       | 39.43/0.10                    | 0.00/0.00                     | 0.00/0.00                                              | 0.00/0.00                |
| 9                 | CL9               | LTR: Copia     | 170.79/0.38                                                        | 0.00/0.00                                              | 0.00/0.00                  | 0.00/0.00                     | 0.00/0.00                      | 0.00/0.00                       | 185.60/0.46                   | 0.00/0.00                     | 0.00/0.00                                              | 56.18/0.15               |
| 10                | CL10              | LTR: Gypsy     | 108.270.24/                                                        | 0.00/0.00                                              | 0.00/0.00                  | 0.01/0.00                     | 0.00/0.00                      | 0.00/0.00                       | 51.45/0.13                    | 0.00/0.00                     | 0.00/0.00                                              | 0.00/0.00                |
| 11                | CL11              | TIR: CACTA     | 107.94/0.24                                                        | 0.13/0.00                                              | 1.19/0.00                  | 0.33/0.00                     | 0.00/0.00                      | 24.89/0.07                      | 82.39/0.20                    | 0.07/0.00                     | 0.56/0.00                                              | 0.06/0.00                |
| 12                | CL12              | TIR: CACTA     | 90.77/0.20                                                         | 5.05/0.01                                              | 59.17/0.18                 | 5.95/0.01                     | 3.76/0.00                      | 22.09/0.07                      | 54.52/0.13                    | 4.48/0.01                     | 14.94/0.03                                             | 0.47/0.00                |
| 13                | CL13              | LTR: Copia     | 75.07/0.17                                                         | 22.27/0.03                                             | 15.13/0.05                 | 50.18/0.11                    | 40.38/0.05                     | 85.11/0.25                      | 78.30/0.19                    | 49.02/0.11                    | 51.39/0.12                                             | 2.89/0.01                |
| 14                | CL14              | 5S rDNA        | 74.86/0.17                                                         | 2.12/0.00                                              | 13.81/0.04                 | 0.08/0.00                     | 1.93/0.00                      | 29.26/0.09                      | 86.31/0.21                    | 0.00/0.00                     | 0.00/0.00                                              | 0.00/0.00                |
| 15                | CL18              | 35S rDNA       | 67.48/0.15                                                         | 96.62/0.15                                             | 46.49/0.14                 | 26.94/0.06                    | 94.90/0.11                     | 27.63/0.08                      | 73.30/0.18                    | 49.10/0.11                    | 64.06/0.15                                             | 29.87/0.08               |
| 16                | CL16              | LTR: Gypsy     | 64.81/0.14                                                         | 0.00/0.00                                              | 0.00/0.00                  | 0.00/0.00                     | 0.00/0.00                      | 0.00/0.00                       | 12.81/0.03                    | 0.00/0.00                     | 0.00/0.00                                              | 0.00/0.00                |
| 17                | CL15              | LTR: Copia     | 64.47/0.14                                                         | 0.52/0.00                                              | 0.46/0.00                  | 0.38/0.00                     | 0.00/0.00                      | 72.34/0.22                      | 9.47/0.02                     | 0.44/0.00                     | 0.00/0.00                                              | 0.00/0.00                |
| 18                | CL19              | LTR: Gypsy     | 61.51/0.14                                                         | 4.11/0.01                                              | 0.00/0.00                  | 0.00/0.00                     | 1.19/0.00                      | 18.42/0.05                      | 63.77/0.16                    | 0.00/0.00                     | 1.01/0.00                                              | 0.00/0.00                |
| 19                | CL20              | Low complexity | 59.69/0.13                                                         | 0.00/0.00                                              | 0.00/0.00                  | 0.00/0.00                     | 0.00/0.00                      | 0.32/0.00                       | 5.33/0.01                     | 0.00/0.00                     | 0.00/0.00                                              | 0.00/0.00                |
| 20                | CL17              | LTR: Gypsy     | 58.43/0.13                                                         | 0.00/0.00                                              | 0.00/0.00                  | 0.00/0.00                     | 0.00/0.00                      | 0.00/0.00                       | 29.28/0.07                    | 0.00/0.00                     | 0.00/0.00                                              | 0.16/0.00                |
| 21                | CL21              | LTR: Copia     | 54.29/0.12                                                         | 0.00/0.00                                              | 0.00/0.00                  | 0.97/0.00                     | 22.06/0.03                     | 10.10/0.03                      | 8.66/0.02                     | 0.68/0.00                     | 4.55/0.01                                              | 0.00/0.00                |
| 22                | CL22              | LTR: Copia     | 52.43/0.12                                                         | 222.62/0.35                                            | 0.00/0.00                  | 84.24/0.18                    | 39.93/0.05                     | 37.86/0.11                      | 71.99/0.18                    | 137.18/0.32                   | 139.41/0.32                                            | 0.00/0.00                |

|              |      |                |                      |                    |                    |                    |                    |                    |                     |                    |                    |                    |
|--------------|------|----------------|----------------------|--------------------|--------------------|--------------------|--------------------|--------------------|---------------------|--------------------|--------------------|--------------------|
| 23           | CL27 | Tandem repeat  | 42.23/0.09           | 0.00/0.00          | 0.00/0.00          | 0.25/0.00          | 0.00/0.00          | 2.38/0.01          | 2.41/0.01           | 0.00/0.00          | 0.00/0.00          | 0.00/0.00          |
| 24           | CL24 | LTR: Gypsy     | 40.01/0.09           | 0.10/0.00          | 0.00/0.00          | 0.01/0.00          | 0.00/0.00          | 4.72/0.01          | 16.37/0.04          | 0.00/0.00          | 0.00/0.00          | 0.00/0.00          |
| 25           | CL29 | 35S rDNA       | 37.99/0.08           | 91.30/0.14         | 56.05/0.17         | 20.71/0.05         | 77.18/0.09         | 35.17/0.10         | 59.17/0.15          | 44.68/0.10         | 55.89/0.13         | 37.09/0.10         |
| 26           | CL23 | LTR: Gypsy     | 37.77/0.08           | 0.00/0.00          | 0.00/0.00          | 0.03/0.00          | 0.00/0.00          | 0.00/0.00          | 20.61/0.05          | 0.00/0.00          | 0.00/0.00          | 0.00/0.00          |
| 27           | CL30 | LTR: Gypsy     | 37.39/0.08           | 0.00/0.00          | 0.00/0.00          | 0.02/0.00          | 0.00/0.00          | 3.00/0.01          | 22.33/0.05          | 0.00/0.00          | 0.22/0.00          | 0.00/0.00          |
| 28           | CL25 | LTR: Gypsy     | 35.55/0.08           | 0.00/0.00          | 0.00/0.00          | 0.01/0.00          | 0.00/0.00          | 0.00/0.00          | 12.16/0.03          | 0.00/0.00          | 0.00/0.00          | 0.00/0.00          |
| 29           | CL28 | LTR: Copia     | 33.44/0.07           | 0.00/0.00          | 0.00/0.00          | 0.00/0.00          | 0.00/0.00          | 0.00/0.00          | 22.94/0.06          | 0.00/0.00          | 0.00/0.00          | 2.08/0.01          |
| 30           | CL26 | LTR: Gypsy     | 32.64/0.07           | 0.00/0.00          | 0.00/0.00          | 0.05/0.00          | 0.00/0.00          | 0.11/0.00          | 16.00/0.04          | 0.00/0.00          | 0.00/0.00          | 0.00/0.00          |
| 31           | CL31 | LTR: Gypsy     | 31.06/0.07           | 0.37/0.00          | 10.28/0.03         | 2.25/0.00          | 0.00/0.00          | 16.87/0.05         | 29.57/0.07          | 0.37/0.00          | 4.71/0.01          | 0.33/0.00          |
| 32           | CL32 | LTR: Copia     | 29.45/0.07           | 9.17/0.01          | 0.00/0.00          | 0.92/0.00          | 14.45/0.02         | 2.35/0.01          | 29.89/0.07          | 0.52/0.00          | 10.06/0.02         | 25.63/0.07         |
| 33           | CL34 | Low complexity | 27.92/0.06           | 0.00/0.00          | 0.00/0.00          | 0.01/0.00          | 0.00/0.00          | 1.17/0.00          | 12.95/0.03          | 0.00/0.00          | 0.00/0.00          | 0.00/0.00          |
| 34           | CL33 | LTR: Gypsy     | 26.24/0.06           | 0.00/0.00          | 0.00/0.00          | 0.03/0.00          | 0.00/0.00          | 5.92/0.02          | 52.86/0.13          | 0.00/0.00          | 0.00/0.00          | 0.00/0.00          |
| 35           | CL35 | Low complexity | 25.92/0.06           | 0.00/0.00          | 0.00/0.00          | 0.00/0.00          | 0.00/0.00          | 0.00/0.00          | 10.94/0.03          | 0.00/0.00          | 0.00/0.00          | 0.00/0.00          |
| 36           | CL40 | 5S rDNA        | 24.49/0.05           | 11.45/0.02         | 0.67/0.00          | 0.95/0.00          | 10.69/0.01         | 4.39/0.01          | 3.87/0.01           | 0.29/0.00          | 3.38/0.01          | 4.09/0.01          |
| 37           | CL39 | LTR: Copia     | 23.88/0.05           | 0.00/0.00          | 0.00/0.00          | 0.00/0.00          | 0.00/0.00          | 0.00/0.00          | 12.33/0.03          | 0.00/0.00          | 0.00/0.00          | 1.35/0.00          |
| 38           | CL37 | LTR: Gypsy     | 23.79/0.05           | 4.05/0.01          | 0.67/0.00          | 1.81/0.00          | 1.86/0.00          | 8.17/0.02          | 43.18/0.11          | 1.73/0.00          | 7.48/0.02          | 1.49/0.00          |
| 39           | CL42 | Helitron       | 21.39/0.05           | 0.00/0.00          | 0.00/0.00          | 0.03/0.00          | 0.00/0.00          | 4.87/0.01          | 9.81/0.02           | 0.00/0.00          | 0.00/0.00          | 0.00/0.00          |
| 40           | CL41 | LTR: Copia     | 20.53/0.05           | 0.00/0.00          | 0.00/0.00          | 1.76/0.00          | 2.82/0.00          | 3.13/0.01          | 18.69/0.05          | 2.18/0.01          | 1.06/0.00          | 1.41/0.00          |
| 41           | CL36 | Low complexity | 20.34/0.05           | 0.00/0.00          | 0.00/0.00          | 0.00/0.00          | 0.00/0.00          | 0.00/0.00          | 0.51/0.00           | 0.00/0.00          | 0.00/0.00          | 0.00/0.00          |
| 42           | CL46 | LTR: Gypsy     | 19.73/0.04           | 0.00/0.00          | 0.00/0.00          | 0.00/0.00          | 0.00/0.00          | 0.00/0.00          | 10.18/0.03          | 0.00/0.00          | 0.00/0.00          | 0.00/0.00          |
| 43           | CL43 | LTR: Copia     | 19.21/0.04           | 0.00/0.00          | 0.00/0.00          | 0.00/0.00          | 0.00/0.00          | 0.00/0.00          | 10.15/0.02          | 0.00/0.00          | 0.00/0.00          | 2.94/0.01          |
| 44           | CL38 | LTR: Gypsy     | 19.20/0.04           | 0.00/0.00          | 0.00/0.00          | 0.00/0.00          | 0.00/0.00          | 0.00/0.00          | 5.58/0.01           | 0.00/0.00          | 0.00/0.00          | 0.00/0.00          |
| 45           | CL47 | LTR: Gypsy     | 18.86/0.04           | 0.00/0.00          | 0.00/0.00          | 0.05/0.00          | 0.00/0.00          | 0.00/0.00          | 11.25/0.03          | 0.00/0.00          | 0.00/0.00          | 0.00/0.00          |
| 46           | CL45 | Low complexity | 15.67/0.03           | 0.00/0.00          | 0.00/0.00          | 0.00/0.00          | 0.00/0.00          | 0.00/0.00          | 1.86/0.00           | 0.00/0.00          | 0.00/0.00          | 0.00/0.00          |
| 47           | CL44 | Low complexity | 14.41/0.03           | 0.00/0.00          | 0.00/0.00          | 0.00/0.00          | 0.00/0.00          | 0.00/0.00          | 2.04/0.01           | 0.00/0.00          | 0.00/0.00          | 0.00/0.00          |
| <b>TOTAL</b> |      |                | <b>9435.43/21.00</b> | <b>471.88/0.74</b> | <b>208.76/0.63</b> | <b>199.87/0.44</b> | <b>312.06/0.37</b> | <b>589.42/1.76</b> | <b>2504.13/6.17</b> | <b>291.35/0.67</b> | <b>360.44/0.82</b> | <b>218.94/0.58</b> |

\* Clusters are ranked in order of their abundance in *F. affinis*.

† Names from RepeatExplorer.

‡ Given to 2 dp. Values for *F. affinis* are shown first; other species are then listed alphabetically.

**Table S6** Top repeat families from *Fritillaria imperialis*.

| Rank <sup>*</sup> | Name <sup>†</sup> | Repeat Type    | Estimated abundance (Mb)/proportion of the genome (%) <sup>‡</sup> |                            |                                                         |                            |                                |                                 |                               |                               |                                                        |                          |
|-------------------|-------------------|----------------|--------------------------------------------------------------------|----------------------------|---------------------------------------------------------|----------------------------|--------------------------------|---------------------------------|-------------------------------|-------------------------------|--------------------------------------------------------|--------------------------|
|                   |                   |                | <i>Fritillaria imperialis</i>                                      | <i>Fritillaria affinis</i> | <i>Fritillaria alfredae</i> subsp. <i>glaucoviridis</i> | <i>Fritillaria davidii</i> | <i>Fritillaria koidzumiana</i> | <i>Fritillaria maximowiczii</i> | <i>Fritillaria pteriflora</i> | <i>Fritillaria sewerzowii</i> | <i>Fritillaria tubiformis</i> subsp. <i>tubiformis</i> | <i>Lilium pyrenaicum</i> |
| 1                 | CL1               | LTR: Gypsy     | 749.25/1.64                                                        | 0.34/0.00                  | 0.12/0.00                                               | 0.39/0.00                  | 0.85/0.00                      | 0.16/0.00                       | 0.06/0.00                     | 73.14/0.17                    | 0.66/0.00                                              | 0.09/0.00                |
| 2                 | CL2               | LTR: Gypsy     | 406.04/0.89                                                        | 0.08/0.00                  | 0.36/0.00                                               | 0.00/0.00                  | 0.27/0.00                      | 0.03/0.00                       | 0.06/0.00                     | 24.56/0.06                    | 0.00/0.00                                              | 0.00/0.00                |
| 3                 | CL3               | LTR: Gypsy     | 358.28/0.79                                                        | 0.14/0.00                  | 0.00/0.00                                               | 0.00/0.00                  | 0.00/0.00                      | 0.00/0.00                       | 0.23/0.00                     | 81.15/0.19                    | 0.00/0.00                                              | 0.00/0.00                |
| 4                 | CL4               | LTR: Gypsy     | 325.07/0.71                                                        | 0.07/0.00                  | 1.24/0.00                                               | 0.00/0.00                  | 4.30/0.01                      | 0.08/0.00                       | 0.00/0.00                     | 128.15/0.29                   | 0.27/0.00                                              | 0.00/0.00                |
| 5                 | CL5               | TIR: CACTA     | 213.91/0.47                                                        | 2.89/0.01                  | 7.73/0.01                                               | 13.36/0.04                 | 1.55/0.00                      | 1.33/0.00                       | 1.03/0.00                     | 82.17/0.19                    | 5.35/0.01                                              | 0.40/0.00                |
| 6                 | CL6               | LTR: Copia     | 202.28/0.44                                                        | 26.47/0.06                 | 212.00/0.33                                             | 0.00/0.00                  | 74.87/0.09                     | 34.36/0.10                      | 39.96/0.01                    | 244.82/0.56                   | 157.22/0.36                                            | 0.00/0.00                |
| 7                 | CL7               | Pararetrovirus | 159.72/0.35                                                        | 0.03/0.00                  | 0.00/0.00                                               | 0.00/0.00                  | 0.00/0.00                      | 0.00/0.00                       | 0.00/0.00                     | 0.00/0.00                     | 0.00/0.00                                              | 0.00/0.00                |
| 8                 | CL9               | LTR: Copia     | 122.89/0.27                                                        | 8.48/0.02                  | 27.85/0.04                                              | 0.00/0.00                  | 0.00/0.00                      | 25.46/0.08                      | 7.61/0.00                     | 143.94/0.33                   | 31.36/0.07                                             | 0.00/0.00                |
| 9                 | CL8               | LTR: Gypsy     | 121.12/0.27                                                        | 0.05/0.00                  | 2.00/0.00                                               | 0.05/0.00                  | 0.00/0.00                      | 0.12/0.00                       | 0.04/0.00                     | 73.11/0.17                    | 0.87/0.00                                              | 0.00/0.00                |
| 10                | CL10              | LTR: Gypsy     | 111.60/0.24                                                        | 0.06/0.00                  | 0.00/0.00                                               | 0.00/0.00                  | 0.00/0.00                      | 0.00/0.00                       | 0.18/0.00                     | 18.91/0.04                    | 0.00/0.00                                              | 0.00/0.00                |
| 11                | CL11              | Low complexity | 106.06/0.23                                                        | 0.03/0.00                  | 0.00/0.00                                               | 0.00/0.00                  | 0.00/0.00                      | 0.00/0.00                       | 0.21/0.00                     | 8.36/0.02                     | 0.00/0.00                                              | 0.00/0.00                |
| 12                | CL12              | LTR: Gypsy     | 94.68/0.21                                                         | 0.06/0.00                  | 0.20/0.00                                               | 0.05/0.00                  | 0.00/0.00                      | 0.00/0.00                       | 0.10/0.00                     | 28.30/0.07                    | 0.43/0.00                                              | 0.13/0.00                |
| 13                | CL14              | LTR: Gypsy     | 65.94/0.14                                                         | 0.00/0.00                  | 0.00/0.00                                               | 0.06/0.00                  | 0.00/0.00                      | 0.00/0.00                       | 0.00/0.00                     | 0.00/0.00                     | 0.00/0.00                                              | 0.00/0.00                |
| 14                | CL13              | Low complexity | 62.59/0.14                                                         | 0.00/0.00                  | 0.00/0.00                                               | 0.00/0.00                  | 0.00/0.00                      | 0.00/0.00                       | 0.05/0.00                     | 19.01/0.04                    | 0.00/0.00                                              | 0.00/0.00                |
| 15                | CL15              | TIR: CACTA     | 59.83/0.13                                                         | 6.75/0.02                  | 9.18/0.01                                               | 8.23/0.02                  | 24.52/0.03                     | 16.01/0.05                      | 18.42/0.00                    | 34.07/0.08                    | 14.58/0.03                                             | 10.44/0.03               |
| 16                | CL16              | LTR: Copia     | 57.51/0.13                                                         | 1.25/0.00                  | 62.50/0.10                                              | 18.03/0.05                 | 35.28/0.04                     | 1.49/0.00                       | 0.51/0.00                     | 54.33/0.12                    | 46.61/0.11                                             | 14.22/0.04               |
| 17                | CL18              | LTR: Gypsy     | 52.88/0.12                                                         | 0.00/0.00                  | 0.00/0.00                                               | 0.00/0.00                  | 0.00/0.00                      | 0.00/0.00                       | 0.00/0.00                     | 0.00/0.00                     | 0.00/0.00                                              | 0.00/0.00                |
| 18                | CL17              | LTR: Copia     | 48.55/0.11                                                         | 10.21/0.02                 | 14.38/0.02                                              | 0.00/0.00                  | 28.13/0.03                     | 50.86/0.15                      | 8.81/0.00                     | 33.48/0.08                    | 24.17/0.05                                             | 0.00/0.00                |
| 19                | CL20              | LTR: Gypsy     | 41.90/0.09                                                         | 0.05/0.00                  | 0.00/0.00                                               | 0.00/0.00                  | 0.00/0.00                      | 0.00/0.00                       | 0.00/0.00                     | 0.31/0.00                     | 0.00/0.00                                              | 0.00/0.00                |
| 20                | CL23              | 35S rDNA       | 40.26/0.09                                                         | 40.66/0.09                 | 103.17/0.16                                             | 46.89/0.14                 | 95.21/0.11                     | 25.03/0.07                      | 54.34/0.01                    | 62.42/0.14                    | 67.77/0.15                                             | 29.40/0.08               |
| 21                | CL21              | LTR: Copia     | 38.70/0.08                                                         | 8.11/0.02                  | 26.53/0.04                                              | 8.26/0.02                  | 21.23/0.02                     | 10.66/0.03                      | 14.82/0.00                    | 55.94/0.13                    | 31.81/0.07                                             | 0.00/0.00                |
| 22                | CL19              | LTR: Gypsy     | 38.49/0.08                                                         | 0.02/0.00                  | 0.00/0.00                                               | 0.00/0.00                  | 0.00/0.00                      | 0.00/0.00                       | 0.00/0.00                     | 5.10/0.01                     | 0.00/0.00                                              | 0.00/0.00                |

|              |      |                |              |             |             |             |             |             |             |              |             |             |
|--------------|------|----------------|--------------|-------------|-------------|-------------|-------------|-------------|-------------|--------------|-------------|-------------|
| 23           | CL22 | LTR: Gypsy     | 35.95/0.08   | 0.03/0.00   | 0.00/0.00   | 0.00/0.00   | 0.00/0.00   | 2.79/0.01   | 0.35/0.00   | 30.76/0.07   | 0.91/0.00   | 0.00/0.00   |
| 24           | CL24 | LTR: Copia     | 35.59/0.08   | 0.01/0.00   | 17.09/0.03  | 0.00/0.00   | 53.48/0.06  | 41.90/0.12  | 0.00/0.00   | 30.55/0.07   | 20.45/0.05  | 0.00/0.00   |
| 25           | CL25 | LTR: Gypsy     | 31.25/0.07   | 4.49/0.01   | 5.83/0.01   | 19.16/0.06  | 0.15/0.00   | 9.22/0.03   | 5.85/0.00   | 8.18/0.02    | 17.46/0.04  | 0.77/0.00   |
| 26           | CL27 | Low complexity | 30.82/0.07   | 0.00/0.00   | 0.00/0.00   | 0.00/0.00   | 0.00/0.00   | 0.00/0.00   | 0.00/0.00   | 1.94/0.00    | 0.00/0.00   | 0.00/0.00   |
| 27           | CL28 | Low complexity | 30.35/0.07   | 0.00/0.00   | 0.00/0.00   | 0.00/0.00   | 0.00/0.00   | 0.00/0.00   | 0.00/0.00   | 0.00/0.00    | 0.00/0.00   | 0.00/0.00   |
| 28           | CL26 | Low complexity | 26.57/0.06   | 0.00/0.00   | 0.00/0.00   | 0.00/0.00   | 0.00/0.00   | 0.00/0.00   | 0.00/0.00   | 0.00/0.00    | 0.00/0.00   | 0.00/0.00   |
| 29           | CL29 | LTR: Gypsy     | 24.88/0.05   | 0.07/0.00   | 0.00/0.00   | 0.00/0.00   | 0.00/0.00   | 0.07/0.00   | 0.05/0.00   | 5.23/0.01    | 0.07/0.00   | 0.00/0.00   |
| 30           | CL30 | LTR: Copia     | 24.36/0.05   | 0.00/0.00   | 48.33/0.08  | 0.00/0.00   | 32.26/0.04  | 4.35/0.01   | 0.00/0.00   | 23.22/0.05   | 28.81/0.07  | 0.77/0.00   |
| 31           | CL34 | LINE: L1       | 23.29/0.05   | 0.52/0.00   | 0.77/0.00   | 0.00/0.00   | 0.00/0.00   | 3.06/0.01   | 0.00/0.00   | 15.67/0.04   | 0.41/0.00   | 0.00/0.00   |
| 32           | CL39 | 35S rDNA       | 22.90/0.05   | 32.36/0.07  | 92.01/0.14  | 56.05/0.17  | 76.98/0.09  | 35.69/0.11  | 56.95/0.01  | 44.68/0.10   | 56.34/0.13  | 36.55/0.10  |
| 33           | CL31 | LTR: Gypsy     | 21.65/0.05   | 0.00/0.00   | 0.00/0.00   | 0.00/0.00   | 0.00/0.00   | 0.00/0.00   | 0.00/0.00   | 0.00/0.00    | 0.00/0.00   | 0.00/0.00   |
| 34           | CL32 | LTR: Copia     | 21.59/0.05   | 0.75/0.00   | 0.00/0.00   | 0.00/0.00   | 0.00/0.00   | 0.00/0.00   | 0.00/0.00   | 0.22/0.00    | 0.00/0.00   | 0.94/0.00   |
| 35           | CL37 | Low complexity | 21.20/0.05   | 0.26/0.00   | 0.00/0.00   | 0.05/0.00   | 0.70/0.00   | 0.96/0.00   | 0.00/0.00   | 0.00/0.00    | 0.78/0.00   | 0.00/0.00   |
| 36           | CL33 | LTR: Copia     | 21.13/0.05   | 1.09/0.00   | 26.64/0.04  | 0.00/0.00   | 4.38/0.01   | 4.90/0.01   | 0.67/0.00   | 32.74/0.08   | 17.40/0.04  | 7.50/0.02   |
| 37           | CL35 | Low complexity | 21.07/0.05   | 0.00/0.00   | 0.00/0.00   | 0.00/0.00   | 0.00/0.00   | 0.00/0.00   | 0.00/0.00   | 8.13/0.02    | 0.00/0.00   | 0.00/0.00   |
| 38           | CL36 | LTR: Gypsy     | 19.86/0.04   | 0.00/0.00   | 0.00/0.00   | 0.00/0.00   | 0.00/0.00   | 0.00/0.00   | 0.00/0.00   | 15.16/0.03   | 0.00/0.00   | 0.06/0.00   |
| 39           | CL38 | Low complexity | 19.81/0.04   | 0.00/0.00   | 5.94/0.01   | 0.00/0.00   | 0.00/0.00   | 0.00/0.00   | 0.00/0.00   | 1.17/0.00    | 0.00/0.00   | 0.00/0.00   |
| 40           | CL40 | Low complexity | 19.49/0.04   | 0.00/0.00   | 0.00/0.00   | 0.00/0.00   | 0.00/0.00   | 0.00/0.00   | 0.00/0.00   | 9.18/0.02    | 0.00/0.00   | 0.08/0.00   |
| 41           | CL41 | LTR: Gypsy     | 19.47/0.04   | 0.01/0.00   | 0.00/0.00   | 0.00/0.00   | 0.00/0.00   | 0.00/0.00   | 0.00/0.00   | 0.00/0.00    | 0.00/0.00   | 0.00/0.00   |
| <b>TOTAL</b> |      |                |              |             |             |             |             |             |             |              |             |             |
| <b>L</b>     |      |                | 3948.77/8.66 | 145.31/0.32 | 663.88/1.04 | 170.58/0.51 | 454.17/0.53 | 268.51/0.80 | 210.31/0.05 | 1398.10/3.22 | 523.74/1.19 | 101.33/0.27 |

\* Clusters are ranked in order of their abundance in *F. imperialis*.

† Names from RepeatExplorer.

‡ Given to 2 dp. Values for *F. imperialis* are shown first; other species are then listed alphabetically.

**Table S7** Single/low-copy fraction size and genome size.

| Species                                                                                       | Family        | % single/low-copy DNA <sup>a</sup> | Ploidy <sup>b</sup> | 1C-value (Mb) | Size of single/low-copy fraction per 1C genome <sup>c</sup> | 1Cx-value (Mb) | Size of single/low-copy fraction per 1Cx genome |
|-----------------------------------------------------------------------------------------------|---------------|------------------------------------|---------------------|---------------|-------------------------------------------------------------|----------------|-------------------------------------------------|
| <i>Agoseris grandiflora</i>                                                                   | Asteraceae    | 57.01                              | 2                   | 1956          | 1115                                                        | 1956           | 1115                                            |
| <i>Anacyclus depressus</i>                                                                    | Asteraceae    | 11.03                              | 2                   | 6064          | 669                                                         | 6064           | 669                                             |
| <i>Anemone blanda</i>                                                                         | Ranunculaceae | 42.99                              | 2                   | 14743         | 6338                                                        | 14743          | 6338                                            |
| <i>Anemone coronaria</i>                                                                      | Ranunculaceae | 47.01                              | n/a                 | 10915         | 5131                                                        | n/a            | n/a                                             |
| <i>Anemone cylindrica</i>                                                                     | Ranunculaceae | 34.98                              | 2                   | 9095          | 3182                                                        | 9095           | 3182                                            |
| <i>Anemone pavoniana</i>                                                                      | Ranunculaceae | 38.00                              | 2                   | 12152         | 4618                                                        | 12152          | 4618                                            |
| <i>Anemone riparia</i>                                                                        | Ranunculaceae | 33.02                              | 2                   | 8753          | 2890                                                        | 8753           | 2890                                            |
| <i>Anthemis altissima</i>                                                                     | Asteraceae    | 33.02                              | n/a                 | 7726          | 2551                                                        | n/a            | n/a                                             |
| <i>Anthemis montana</i>                                                                       | Asteraceae    | 36.99                              | n/a                 | 8264          | 3057                                                        | n/a            | n/a                                             |
| <i>Avena sativa</i> <sup>d</sup>                                                              | Poaceae       | 21.00                              | 6                   | 12934         | 2716                                                        | 4311           | 905                                             |
| <i>Beta vulgaris</i>                                                                          | Amaranthaceae | 36.99                              | 2                   | 1223          | 452                                                         | 1223           | 452                                             |
| <i>Brassica pekinensis</i> (syn. <i>Brassica rapa</i> subsp. <i>pekinensis</i> ) <sup>e</sup> | Brassicaceae  | 47.01                              | 2                   | 782           | 368                                                         | 782            | 368                                             |
| <i>Capsella bursa-pastoris</i>                                                                | Brassicaceae  | 52.76                              | 4                   | 391           | 206                                                         | 196            | 103                                             |
| <i>Cinnamomum camphora</i>                                                                    | Lauraceae     | 62.70                              | 2                   | 587           | 368                                                         | 587            | 368                                             |
| <i>Crepis conyzifolia</i>                                                                     | Asteraceae    | 43.50                              | 2                   | 5389          | 2344                                                        | 5389           | 2344                                            |
| <i>Crepis vesicaria</i>                                                                       | Asteraceae    | 25.98                              | 2                   | 4088          | 1062                                                        | 4088           | 1062                                            |
| <i>Daucus carota</i>                                                                          | Apiaceae      | 38.00                              | 2                   | 978           | 372                                                         | 978            | 372                                             |
| <i>Decaisnea fargesii</i>                                                                     | Loranthaceae  | 51.50                              | 2                   | 1980          | 1020                                                        | 1980           | 1020                                            |
| <i>Glycine max</i> <sup>d</sup>                                                               | Fabaceae      | 46.00                              | 2                   | 1100          | 506                                                         | 1100           | 506                                             |
| <i>Gossypium hirsutum</i>                                                                     | Malvaceae     | 68.05                              | 4                   | 2347          | 1597                                                        | 1174           | 799                                             |
| <i>Hordeum vulgare</i>                                                                        | Poaceae       | 30.00                              | 2                   | 5428          | 1628                                                        | 5428           | 1628                                            |
| <i>Hyacinthus orientalis</i>                                                                  | Asparagaceae  | 24.98                              | 2                   | 20856         | 5210                                                        | 20856          | 5210                                            |
| <i>Lactuca serriola</i>                                                                       | Asteraceae    | 44.99                              | 2                   | 1809          | 814                                                         | 1809           | 814                                             |
| <i>Lamium purpureum</i>                                                                       | Lamiaceae     | 40.01                              | 2                   | 1076          | 430                                                         | 1076           | 430                                             |
| <i>Lathyrus articulatus</i>                                                                   | Fabaceae      | 44.01                              | 2                   | 5941          | 2615                                                        | 5941           | 2615                                            |

|                                                                              |                 |       |     |       |      |       |      |
|------------------------------------------------------------------------------|-----------------|-------|-----|-------|------|-------|------|
| <i>Lathyrus hirsutus</i>                                                     | Fabaceae        | 30.02 | 2   | 9756  | 2929 | 9756  | 2929 |
| <i>Lathyrus nissolia</i>                                                     | Fabaceae        | 41.00 | 2   | 6308  | 2587 | 6308  | 2587 |
| <i>Lathyrus ochrus</i>                                                       | Fabaceae        | 40.01 | 2   | 6675  | 2671 | 6675  | 2671 |
| <i>Lathyrus sativus</i>                                                      | Fabaceae        | 33.99 | 2   | 8215  | 2793 | 8215  | 2793 |
| <i>Linum usitatissimum</i>                                                   | Linaceae        | 41.00 | 2   | 685   | 281  | 685   | 281  |
| <i>Liriodendron tulipifera</i>                                               | Magnoliaceae    | 52.49 | 2   | 782   | 411  | 782   | 411  |
| <i>Magnolia soulangiana</i>                                                  | Magnoliaceae    | 60.51 | 4   | 5844  | 3536 | 2922  | 1768 |
| <i>Matthiola incana</i>                                                      | Brassicaceae    | 30.99 | 2   | 2064  | 639  | 2064  | 639  |
| <i>Microseris bigelovii</i>                                                  | Asteraceae      | 48.51 | 2   | 1467  | 712  | 1467  | 712  |
| <i>Microseris douglasii</i>                                                  | Asteraceae      | 54.00 | 2   | 1174  | 634  | 1174  | 634  |
| <i>Microseris laciniata</i>                                                  | Asteraceae      | 46.00 | 2   | 3276  | 1507 | 3276  | 1507 |
| <i>Microseris lindleyi</i>                                                   | Asteraceae      | 44.99 | 2   | 1956  | 880  | 1956  | 880  |
| <i>Nicotiana tabacum</i> <sup>§</sup>                                        | Solanaceae      | 45.00 | 4   | 5061  | 2277 | 2531  | 1139 |
| <i>Petroselinum sativum</i> <sup>§</sup> (syn. <i>Petroselinum crispum</i> ) | Apiaceae        | 30.01 | n/a | 2201  | 660  | n/a   | n/a  |
| <i>Pinus strobus</i>                                                         | Pinaceae        | 14.00 | 2   | 25086 | 3512 | 25086 | 3512 |
| <i>Pisum sativum</i> <sup>§</sup>                                            | Fabaceae        | 27.49 | 2   | 4768  | 1311 | 4768  | 1311 |
| <i>Poa trivialis</i>                                                         | Poaceae         | 18.00 | 2   | 2763  | 497  | 2763  | 497  |
| <i>Pyrrhopappus carolianus</i>                                               | Asteraceae      | 38.00 | 2   | 6137  | 2332 | 6137  | 2332 |
| <i>Pyrrhopappus multicaulis</i>                                              | Asteraceae      | 32.02 | 2   | 6504  | 2082 | 6504  | 2082 |
| <i>Raphanus sativus</i>                                                      | Brassicaceae    | 82.01 | 2   | 538   | 441  | 538   | 441  |
| <i>Secale cereale</i> <sup>§</sup>                                           | Poaceae         | 27.40 | 2   | 8093  | 2218 | 8093  | 2218 |
| <i>Senecio vulgaris</i>                                                      | Asteraceae      | 25.98 | 4   | 1540  | 400  | 770   | 200  |
| <i>Spinacia oleracea</i>                                                     | Amaranthaceae   | 44.99 | 2   | 1002  | 451  | 1002  | 451  |
| <i>Stellaria media</i>                                                       | Caryophyllaceae | 30.99 | 7   | 1027  | 318  | 293   | 91   |
| <i>Triticum aestivum</i> <sup>§</sup>                                        | Poaceae         | 21.00 | 6   | 16944 | 3558 | 5648  | 1186 |
| <i>Tropaeolum majus</i>                                                      | Tropaeolaceae   | 18.03 | 4   | 1296  | 234  | 648   | 117  |
| <i>Tulipa kaufmanniana</i>                                                   | Liliaceae       | 27.00 | 2   | 22078 | 5962 | 22078 | 5962 |
| <i>Veronica persica</i>                                                      | Plantaginaceae  | 36.99 | 4   | 758   | 280  | 379   | 140  |
| <i>Vicia faba</i>                                                            | Fabaceae        | 20.00 | 2   | 13032 | 2606 | 13032 | 2606 |



|                                   |          |       |     |      |     |      |     |
|-----------------------------------|----------|-------|-----|------|-----|------|-----|
| <i>Vicia sativa</i>               | Fabaceae | 20.00 | 2   | 2201 | 440 | 2201 | 440 |
| <i>Vigna radiata</i> <sup>§</sup> | Fabaceae | 50.01 | n/a | 513  | 257 | n/a  | n/a |
| <i>Zea mays</i>                   | Poaceae  | 21.94 | 2   | 2665 | 585 | 2665 | 585 |

\*Data on the percentage of single/low-copy DNA were taken from Elsik & Williams (2000), Thompson (1978) and Wenzel & Hemleben (1982).

†1C-values and ploidy information were taken from release 6.0 of the Plant DNA C-values Database; genome sizes are given to the nearest Mb. For species where the Plant DNA C-values Database contains entries for individuals of different ploidy the diploid values were used. n/a denotes species where there is no ploidy information associated with the genome size estimate in the Plant DNA C-values Database.

‡The size of the S/L fraction per 1C and 1Cx genome size is given to the nearest Mb.

§Multiple independent estimates of the % of S/L DNA were available (three estimates for *Glycine max*, two estimates for all other species indicated), therefore, an average of all values was used.

¶Species are listed under the names given in the original papers, but where a different synonym is used in the Plant DNA C-values Database this is noted in parentheses.

## **Notes S1 Potential impact of differing sequence similarity thresholds on patterns of repeat diversity**

A potential cause of contrasting patterns of repeat diversity between species is the application of different levels of stringency when delimiting families of repetitive elements and assessing their abundance in the genome. Nevertheless, there is no universal consensus on the threshold of sequence similarity that should be used when defining repeat families. A unified classification system for transposable elements was proposed by Wicker et al. (2007), who stipulated that in order to be classified within the same family, sequences must match within the coding region, internal domain or terminal repeat region for at least 80bp with a minimum of 80% similarity along 80% of the matching region (the “80-80-80 rule”). This system has been criticised recently by Elbaidouri and Panaud (2013) who suggest that it may lead to an over-estimation of the number of repeat families and an under-estimation of the abundance of individual families. Elbaidouri and Panaud (2013) propose an alternative approach for classification, albeit one that pertains only to long terminal repeat (LTR) retrotransposons, whereby two LTR retrotransposons belong to the same family if they have a minimum of 60% similarity over 70% of their LTR length.

Studies in species whose genomes are reported to be dominated by a small number of high abundance repeats have also used widely varying levels of stringency when delimiting repeat families and estimating their abundance. In their study of genome size evolution in *Oryza australiensis*, Piegu et al. (2006) assembled reference sequences for three LTR repeat families (which together were estimated to comprise 60% of the *O. australiensis* genome) by creating seed contigs from sets of  $\geq 200$  BAC-end sequences (BES) which had at least 95% similarity across the entire length of their alignment; further BES were then assembled with these seed contigs, using a cut off of at least 90% similarity across their overlapping regions. The copy number of each family (as well as the number of Mb they contributed to the genome) was then estimated using dot-blot hybridisation, at a stringency that is equivalent to *c.* 88% similarity (assuming a 45% GC content for the *O. australiensis* genome) between the probe and the target sequence across the full length of the probe (various probes were used, the sequences of which were not specified, but at least one probe of  $> 1000$ bp was used; Piegu et al. 2006). In contrast with the relatively high level of similarity across

comparatively long stretches of sequence required by Piegu et al. (2006), Hawkins et al. (2006) in their study of genome size evolution in cotton species, considered sequences to belong to the same repeat family if they had > 80% similarity over a region of at least 100bp. The whole genome shotgun sequences they used were on average > 700bp (Hawkins et al. 2006) meaning that sequences matching by > 80% over < 15% of the length would be assigned to the same family. Finally, in a study of the genome composition of barley (*Hordeum vulgare*) using 454 sequences with an average length of 103 bp, the abundance of known repeat families was estimated by using hit numbers from a BLAST search of the 454 reads against a database of reference sequences performed with an E-value cut off of  $1 \times 10^{-6}$ ; any read matching one of the repeat family reference sequences with an E-value of  $\leq 1 \times 10^{-6}$  was assigned to that family (Wicker et al. 2009). However, query sequences with different lengths can have the same percentage similarity and overlap with a subject sequence but different E-values, making it difficult to relate the level of stringency imposed by the use of a particular E-value to that applied in studies that have used a given level of sequence similarity as their cut off.

In our analysis of *Fritillaria*, read pairs were required to have  $\geq 90\%$  similarity across  $\geq 55\%$  of their length (equivalent to a minimum matching length of 220bp for the 400bp reads used during clustering) in order to belong to the same repeat family. When estimating the abundance of individual repeat families, reads had to match one of the reference contigs with  $\geq 90\%$  similarity across  $\geq 55\%$  of the read length in order to be assigned to a particular family. Consequently, the level of stringency applied during our analysis was higher than used in some previous studies and could result in more, lower abundance, repeat families being inferred than has been the case in other species. To test whether our approach to *de novo* identification and quantification of repeat families may create a false impression of higher diversity in *Fritillaria* than in other species, we used the same methods to analyse data from barley (*Hordeum vulgare*). We selected barley for this analysis because: 1 – previous data indicate its genomic composition contrasts starkly with that inferred for *Fritillaria*, as a large portion of the barley genome is made of a small number of high abundance repeat families (Wicker et al. 2009); 2 – data that are equivalent to those used in *Fritillaria* are available (i.e. 454 reads from the GS FLX Titanium platform), therefore removing the possibility that any

difference in the pattern of repeats between barley and *Fritillaria* is due to the use of different types of data. We downloaded a set of barley 454 reads from the Sequence Read Archive (SRA accession number ERR127132) and processed the reads to remove exact duplicates and organellar reads in the same way as described for *Fritillaria* (see Materials and Methods in main text) to create a set of unique nuclear reads for barley. The unique nuclear barley reads were then trimmed and filtered by length (see Materials and Methods) to create a set of 400bp reads. From this dataset, 100,332 reads were randomly sampled using the sequence sampling tool (v. 1.0.0) in RepeatExplorer to create a dataset providing the same level of genome coverage as used for *Fritillaria* (i.e. 0.74%; we used a genome size of  $1C = 5.428$  Gb for barley, which is the prime value for this species in the Plant DNA C-values Database release 6.0, <http://data.kew.org/cvalues/>). We then used RepeatExplorer to cluster the random sample of barley reads, with the same parameter settings as used for *Fritillaria*; cluster merger and the estimation of GP for each cluster were also carried out in the same way as described for *Fritillaria*. Repeat families were annotated with the results of a BLASTN search to the total TREP database (<http://wheat.pw.usda.gov/ITMI/Repeats/>) to allow direct comparison of our results with those of Wicker et al. (2009); the search was performed using an E-value cut off of  $1 \times 10^{-6}$  and clusters were annotated as the repeat type hit by the majority of contigs.

Comparison of the clustering results from barley and *Fritillaria* demonstrate that, at the same level of genome coverage (0.74%), a much higher percentage of reads can be clustered for barley than is the case for either of the *Fritillaria* species; 67219/100332 input reads (67.00%) were clustered for barley, compared with only 326887/830674 reads (39.35%) for *F. affinis* and 279426/842670 reads (33.16%) for *F. imperialis*. The total number of clusters identified in barley (following cluster merger) was only 4483, with an order of magnitude more clusters found in *F. affinis* (49989 clusters in total) and *F. imperialis* (71218 clusters in total). Moreover, whilst the top ten most abundant clusters account for only 17.63% and 6.08% of the *F. affinis* and *F. imperialis* genomes respectively, the top ten clusters from barley account for 38.17% of its genome. These results confirm that barley and *Fritillaria* have contrasting patterns of repeat diversity. We also compared our *de novo* estimates of repeat abundance in barley with those previously reported by Wicker et al. (2009). The most abundant clusters

identified via our approach match the most abundant repeats detected previously in the barley genome. The top five families (all LTR retrotransposons belonging to either the Copia or the Gypsy superfamily; Wicker et al. 2007) in both analyses are: Bare1 (Copia), Sabrina (Gypsy), Wham (Gypsy), BAGY2 (Gypsy) and Surya/Sukkula (Gypsy) – the fifth ranked cluster from our analysis had a significant number of hits to both families; 64% of contigs had a top hit to Surya and 36% of contigs had a top hit to Sukkula). Whilst Wicker et al. (2009) estimated that the top five repeat families in barley accounted for 35.38% of the genome, the abundance calculated via our approach is slightly lower at 30.33%. Also, our abundance estimates for four out of five of the top repeat families are slightly lower than those calculated by Wicker et al. (2009; Bare1 - 9.97% vs. 12.69%; Sabrina - 7.40% vs. 8.45%; Wham - 5.34% vs. 5.50%; Surya/Sukkula - 2.37% vs. 3.59%), although we estimate a higher abundance for the BAGY2 family (5.25% in our analysis versus 5.15% in Wicker *et al.* 2009). Although Bare1 was identified as the most abundant repeat family in both our analysis and that of Wicker *et al.* (2009), we also identified another repeat family with similarity to Bare1 (ranked eighth most abundant in the barley genome, with a genome proportion of 2.08%). We did not merge the two Bare1-type clusters, as both already contained a complete set of conserved domains and although they formed connected components the proportion of similarity hits shared between the two clusters was relatively low (data not shown). However, the combined abundance of these two clusters approaches that estimated previously for Bare1 (*c.* 12% vs. 12.69% estimated by Wicker et al. 2009).

The comparison between barley and *Fritillaria* illustrates that our approach to *de novo* repeat family identification and quantification might result in some additional families being recognised, with consequently lower abundance for individual families, compared with the results of previous studies. Nevertheless, it is also clear that any difference in stringency between the methods we have used and those that have been applied elsewhere does not change the overall picture of repeat diversity in the species analysed. Applying our approach to the analysis of data from barley still reveals a large fraction of the genome to be comprised of a small number of high abundance repeats. The result from this test shows that differences in the specific methods for characterizing repeats are not responsible for creating the broad-scale differences in the patterns of repeat diversity detected, and instead the contrasting genomic composition of *F. affinis* and *F.*

*imperialis* versus plants with smaller genomes reflect real difference in the biology of these species.

### **Notes S2 Analysis of intra-family heterogeneity of repeats in *Fritillaria***

Analysis of the repeat content of *Fritillaria* demonstrates that lineage specific genome size increases cannot be accounted for by the amplification of just a few repetitive element families, as shown in some other plant groups (Hawkins et al. 2006; Piegu et al. 2006). Moreover, the bulk of the genomes of *F. affinis* and *F. imperialis* are apparently composed of a diverse set of relatively low abundance repetitive/repeat-derived DNA. This high level of heterogeneity within the repetitive fraction of the genome could have arisen via distinct pathways: 1 – global amplification of repetitive DNA and high genome turnover, so that many repeat families amplify simultaneously but remain relatively small in size due to rapid deletion of amplified copies; 2 – simultaneous amplification of a number of different repeat families accompanied by low rates of deletion, so that amplified copies accumulate in the genome creating an increasing fraction of repeat-derived DNA that degenerates and diverges over time. If the first of these scenarios is responsible for the pattern of repeat diversity seen in *Fritillaria* then we would expect individual repeat families to be dominated by recently amplified copies that have a high level of sequence similarity to each other. By contrast, if the second of these scenarios were true then repeat families would be predicted to contain copies that had amplified at different times and therefore show greater levels of divergence from one another.

To analyse the level of heterogeneity within individual *F. affinis* and *F. imperialis* repeat families identified from the RepeatExplorer analysis, we examined the average edge weights for graphs from all clusters that include  $\geq 0.05\%$  of the input reads (i.e. the top repeat families; see Table S5, S6). Edge weights are determined using similarity scores from the megablast step of the RepeatExplorer analysis (Novák *et al.*, 2013); higher levels of overlap and sequence similarity between read pairs result in higher edge weights. Therefore, clusters with a higher average edge weight contain a larger number of high similarity pairs than clusters with lower average edge weights. The majority of the top repeat families from *F. affinis* and *F. imperialis* have graphs with average edge weights of  $< 450$ , with a small number having values of  $\geq 500$  (Fig. 3

in main manuscript). For individual repeat families with a range of different average edge weights, we performed all versus all BLAST searches of their constituent reads and recorded pair-wise similarities for hits passing a threshold of  $\geq 55\%$  overlap between the query and subject sequence with  $\geq 90\%$  similarity in the overlapping region. BLAST searches were performed with the same parameter settings as for the *de novo* identification of repeat families (see Materials and Methods in main text). A custom Perl script was then used to filter out hits that did not pass the similarity threshold; self hits and reciprocal hits were also removed. For the filtered set of BLAST hits, histograms of the percentage similarities between read pairs from individual clusters were generated in R (Fig. 3). Plots of sequence similarity for repeat families with average edge weights of  $< 450$  show an absence of peaks of very high similarity read pairs (i.e.  $\geq 98\%$  sequence similarity; see plots for representative families in Fig. 3), with the majority of read pairs having  $< 95\%$  sequence similarity. Although there are a small number of highly similar read pairs, suggesting recent amplification, the pattern of sequence similarity in these repeat families is indicative of the accumulation of copies over time, resulting in read pairs with differing levels of divergence (e.g. Fig. 3c,g). By contrast, plotting the pair-wise sequence similarities for representatives of those few repeat families whose graphs have average edge weights  $> 500$  reveals that they are predominantly composed of reads with high ( $\geq 98\%$ ) similarity to each other, indicative of recent amplification and/or homogenization (Fig. 3e,j).

## Supplementary References

- Ambrožová K, Mandáková T, Bureš P, Neumann P, Leitch IJ, Koblížková A, Macas J, Lysák MA. 2011.** Diverse retrotransposon families and an AT-rich satellite DNA revealed in giant genomes of *Fritillaria* lilies. *Annals of Botany* **107**: 255–268.
- Day PD, Berger M, Hill L, Fay MF, Leitch AR, Leitch IJ, Kelly LJ. 2014.** Evolutionary relationships in the medicinally important genus *Fritillaria* L. (Liliaceae). *Molecular Phylogenetics and Evolution* **80**: 11–19.
- Doležel J, Bartoš J, Voglmayr H, Greilhuber J. 2003.** Nuclear DNA content and genome size of trout and human. *Cytometry A* **51**: 127–128.
- Elbaidouri M, Panaud O. 2013.** Comparative genomic paleontology across plant kingdom reveals the dynamics of TE-driven genome evolution. *Genome Biology and Evolution* **5**: 954–965.
- Elsik CG, Williams CG. 2000.** Retroelements contribute to the excess low-copy number DNA in pine. *Molecular and General Genetics* **264**: 47–55.
- Fujimoto S, Ito M, Matsunaga S, Fukui K. 2005.** An upper limit of the ratio of DNA volume to nuclear volume exists in plants. *Genes Genet Syst*, **80**: 345–350.
- Greilhuber J, Doležel J, Lysak MA, Bennett MD. 2005.** The origin, evolution and proposed stabilization of the terms ‘Genome Size’ and ‘C-Value’ to describe nuclear DNA contents. *Annals of Botany* **95**: 91–98.
- Hanson L, McMahon KA, Johnson MAT, Bennett MD. 2001.** First nuclear DNA C-values for 25 angiosperm families. *Annals of Botany* **87**: 251–258.
- Hawkins JS, Kim HR, Nason JD, Wing RA, Wendel JF. 2006.** Differential lineage-specific amplification of transposable elements is responsible for genome size variation in *Gossypium*. *Genome Research* **16**: 1252–1261.
- Leitch IJ, Beaulieu JM, Cheung K, Hanson L, Lysak MA, Fay MF. 2007.** Punctuated genome size evolution in Liliaceae. *Journal of Evolutionary Biology* **20**: 2296–2308.
- Novák P, Neumann P, Pech J, Steinhaisl J, Macas J. 2013.** RepeatExplorer: a Galaxy-based web server for genome-wide characterization of eukaryotic repetitive elements from next-generation sequence reads. *Bioinformatics* **29**: 792–793.



- Piegu B, Guyot R, Picault N, Roulin A, Saniyal A, Kim H, Collura K, Brar DS, Jackson S, Wing RA, et al. 2006.** Doubling genome size without polyploidization: dynamics of retrotransposition-driven genomic expansions in *Oryza australiensis*, a wild relative of rice. *Genome Research* **16**: 1262–1269.
- Thompson W. 1978.** Perspectives on the evolution of plant DNA. *Carnegie Institute of Washington Year Book* **77**: 310–316.
- Wenzel W, Hemleben V. 1982.** A comparative study of genomes in angiosperms. *Plant Systematics and Evolution* **139**: 209–227.
- Wicker T, Sabot F, Hua-Van A, Bennetzen JL, Capy P, Chalhoub B, Flavell A, Leroy P, Morgante M, Panaud O, Paux E, SanMiguel P, Schulman AH. 2007.** A unified classification system for eukaryotic transposable elements. *Nature Reviews Genetics* **8**: 973–982.
- Wicker T, Taudien S, Houben A, Keller B, Graner A, Platzer M, Stein N. 2009.** A whole-genome snapshot of 454 sequences exposes the composition of the barley genome and provides evidence for parallel evolution of genome size in wheat and barley. *Plant Journal* **59**: 712–722.
